# Supplementary material for: A2A Receptor Dysregulation in Dystonia DYT1 Knock-Out Mice
Source: MDPI journal article supplement (doi:10.3390/ijms22052691), 2021-03-07
Supplement: s1 [file s1]

1 Supplementary Material

2

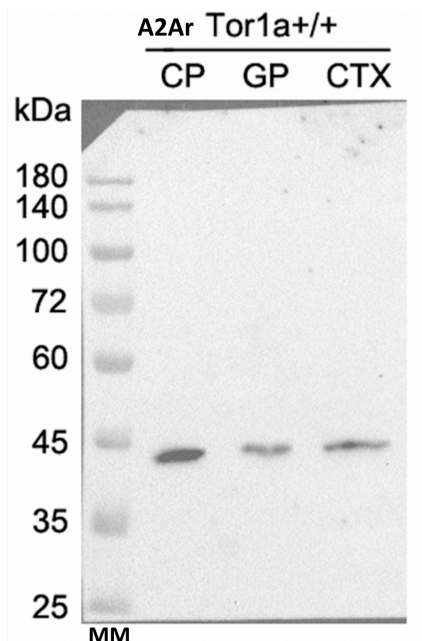

3

4 Figure 1. Image of Western blot analysis of A2A receptors in tissue homogenates of the caudate-  
5 putamen (CP), globus pallidus (GP), and cerebral cortex (CTX). Reference of molecular weight  
6 markers (MM) on the left column. A specific A2A receptor band at about 44-45 kDa is detected in  
7 the three brain areas, more intense in the CP.  
8
